# Supplementary material for: A fluorogenic screening platform enables directed evolution of an alkyne biosynthetic tool
Source: Royal Society of Chemistry journal article supplement (doi:10.1039/c6cc05990b), 2016-01-01
Supplement: c6cc05990b1.pdf [file c6cc05990b1.pdf]

## Supporting information

### A Fluorogenic Screening Platform Enables Directed Evolution of an Alkyne Biosynthetic Tool.

Xuejun Zhu<sup>a</sup>, Peyton Shieh<sup>b</sup>, Michael Su<sup>a</sup>, Carolyn R. Bertozzi<sup>b, c</sup>, Wenjun Zhang<sup>a, d\*</sup>

<sup>a</sup>Department of Chemical and Biomolecular Engineering, University of California, Berkeley, CA 94720.

<sup>b</sup>Department of Chemistry, Stanford University, Stanford, CA 94305. <sup>c</sup>Howard Hughes Medical Institute, Stanford University, Stanford, CA 94305. <sup>d</sup>Physical Biosciences Division, Lawrence Berkeley National Laboratory, Berkeley, CA 94720, USA.

#### Table of Contents

#### Supplementary Methods

#### Supplementary Tables

Table S1. Primers used in this study.

Table S2. Plasmids used in this study.

Table S3. Strains used in this study.

Table S4. Probes used in this study and their performance during reactions.

#### Supplementary Figures

Figure S1. Extracted ion chromatograms for the production of compounds **1** and **2** in the engineered *E.coli*.

Figure S2. LC-HRMS analysis of the fluorogenic bioorthogonal reactions with cell-free supernatants of XZ1, and negative controls.

Figure S3. Linear detection ranges using different amounts of **4**.

Figure S4. Efficiencies in the production of **1** from the engineered *E.coli*.

Figure S5. SDS-PAGE analysis of membrane fractions of the engineered *E. coli*.

Figure S6. Modeled structures of JamB, JamC, and JamB-JamC complex.

Figure S7. Sequence alignment of TtuB, CamB, and JamB.

Figure S8. HR-MS of **1**, **2**, **7**.

## Supplementary methods

**Ep-PCR and Construction of Mutant Library.** Ep-PCR procedure was modified from established protocols<sup>1</sup>. The reaction consisted of 0.35 mM dATP, 0.4 mM dCTP, 0.2 mM dGTP, 1.35 mM dTTP, 1.5 mM MgCl<sub>2</sub>, 1.5 mM MnCl<sub>2</sub>, and 1 U Taq polymerase. The reaction mixture was submitted to 25 cycles of PCR: 95°C for 1 min, 50°C for 1 min, and 68°C for 1 min. The resulting PCR products were digested with DpnI, then Gibson assembled into pXZ44 that was pre-digested with NdeI/XhoI. The Gibson mixture was desalted, co-transformed with pXZ27 to electro-competent BAP1 strain, and plated on LB agar containing 100 µg mL<sup>-1</sup> carbenicillin and 100 µg mL<sup>-1</sup> spectinomycin.

**Mutagenesis of JamB.** Site-directed mutagenesis were performed using the standard QuikChange strategy using relevant templates. To make JamB with CamB N-terminus substitution, the first 4 amino acids of JamB were deleted. To make JamB with TtuB N-terminus substitution, the first 4 amino acids of JamB were replaced with the first 15 amino acids of TtuB. All mutations were verified by DNA sequencing.

**Culture Conditions.** For quantification platform set up or identified JamB mutant verification, engineered BAP1 strains were grown in LB medium with 100 µg mL<sup>-1</sup> carbenicillin and 100 µg mL<sup>-1</sup> spectinomycin at 37 °C to an OD<sub>600</sub> of ~0.4-0.6. The cells were harvested and concentrated 5-fold into fresh F1 medium supplemented with 100 µg mL<sup>-1</sup> carbenicillin, 100 µg mL<sup>-1</sup> spectinomycin, 0.5 mM IPTG, and 1 mM fatty acid (hexanoic acid or 5-hexenoic acid). After 40 hr of growth at 20 °C, cell-free supernatants were used for subsequent plate-reader fluorescence measurements or extracted with ethyl acetate for LC-HRMS analysis. To monitor the alkyne titers in the cultures, we collected cell-free supernatants every a few hours during fermentation for subsequent fluorogenic assays. For directed evolution, BAP1 library were grown in 96-well plates. Each well contained 1 ml of LB medium supplemented with 100 µg mL<sup>-1</sup> carbenicillin and 100 µg mL<sup>-1</sup> spectinomycin. When cultures were grown at 37 °C to an OD<sub>600</sub> of ~0.4, the cell pellets were separated from LB medium and suspended in 200 µL F1 medium supplemented with 100 µg mL<sup>-1</sup> carbenicillin, 100 µg mL<sup>-1</sup> spectinomycin, 0.5 mM IPTG, and 1 mM 5-hexenoic acid. After ~2 days of growth at 20 °C, cell-free supernatants were separated from cell pellets, and were transferred to 96-well black plates for subsequent plate-reader fluorescence measurements.

**Preparation of membrane fractions of the engineered *E.coli*.** Membrane fractions were prepared using a standard protocol<sup>2</sup>.

**Plate-Reader Fluorescence Measurements.** Reactions were run in a 96-well black plate, and measurements were performed using a Tecan Safire Microplate Reader. Each well had 200 µL of sample containing 0.75 µM of probe, 5 mM ascorbic acid, 500 µM CuSO<sub>4</sub>, 100 µM BTAA, and 190 µL of cultures. The reactions were performed in dark for 10 min at room temperature. For linear detection range determination, different concentrations of **4** (0.75, 3, 10 µM) and alkynes, and similar conditions were used.

**LC-HRMS Analysis.** LC-HRMS was performed on an Agilent Technologies 6520 Accurate Mass QTOF LC-MS with an Agilent Eclipse Plus C18 column (4.6 × 100 mm). A linear gradient

of 2-95% CH<sub>3</sub>CN (v/v) over 20 min and 95% CH<sub>3</sub>CN for a further 5 min in H<sub>2</sub>O supplemented with 0.1% (v/v) formic acid at a flow rate of 0.5 mL min<sup>-1</sup> was used.

**Sequence Alignment Analysis.** Amino acid sequence alignment of JamB, CamB, and TtuB was performed using on-line program Clustal Omega.

**Protein Structure Modeling and docking.** Protein structures of JamB, JamC were modeled using on-line program HHpred<sup>3</sup> using SCD1<sup>4, 5</sup> and CurA<sup>6</sup> (Protein Data Bank entry 4ZYO/4YMK and 2LIU, respectively). JamC was then docked to the electro-positive surface of JamB near the substrate entrance using ClusPro<sup>7, 8</sup>.

## References

1. X. Gao, X. Xie, I. Pashkov, M. R. Sawaya, J. Laidman, W. Zhang, R. Cacho, T. O. Yeates and Y. Tang, *Chem Biol*, 2009, **16**, 1064-1074.
2. X. Zhu, M. Su, K. Manickam and W. Zhang, *ACS Chem. Biol.*, 2015, **10**, 2785-2793.
3. J. Söding, A. Biegert and A. N. Lupas, *Nucleic Acids Res.*, 2005, **33**, W244-W248.
4. H. Wang, M. G. Klein, H. Zou, W. Lane, G. Snell, I. Levin, K. Li and B. C. Sang, *Nat. Struct. Mol. Biol.*, 2015, **22**, 581-585.
5. Y. Bai, J. G. McCoy, E. J. Levin, P. Sobrado, K. R. Rajashankar, B. G. Fox and M. Zhou, *Nature*, 2015, **524**, 252-256.
6. A. Busche, D. Gottstein, C. Hein, N. Ripin, I. Pader, P. Tufar, E. B. Eisman, L. Gu, C. T. Walsh, D. H. Sherman, F. Lohr, P. Guntert and V. Dotsch, *ACS Chem. Biol.*, 2012, **7**, 378-386.
7. S. R. Comeau, D. W. Gatchell, S. Vajda and C. J. Camacho, *Bioinformatics (Oxford, England)*, 2004, **20**, 45-50.
8. S. R. Comeau, D. W. Gatchell, S. Vajda and C. J. Camacho, *Nucleic Acids Res.*, 2004, **32**, W96-99.

## Supplementary Tables

**Table S1.** Primers used in this study.

| Primer    | Sequence (5'→3')                                       | Note                                     |
|-----------|--------------------------------------------------------|------------------------------------------|
| pXZ43-B-F | agtatattagttaagtataagaaggagatatacat                    | Used for JamB mutant library generation. |
| pXZ43-B-R | aatttcgcagcagcggtttctttaccagactcgag                    |                                          |
| pXZ167_F  | atgtcaatgccaatAgatgtgagcaaaaaa                         | Used for creation of JamB (M5I)          |
| pXZ167_R  | tttttgctcacatcTattggcattgacat                          |                                          |
| pXZ168_F  | ttaatcgcaattatgCagtgtggatagttt                         | Used for creation of JamB (V189A)        |
| pXZ168_R  | aaactatccacactGcataattgcgattaa                         |                                          |
| pXZ169_F  | cccttcgatagtaaTgaccagagtcggaa                          | Used for creation of JamB (K250N)        |
| pXZ169_R  | ttccgactctggtcAttactatcgaaaggg                         |                                          |
| pXZ205_F  | atgtcaatgccGAGgatgtgagcaaaa                            | Used for creation of JamB (M5E)          |
| pXZ205_R  | ttttgctcacatcCTCtggcattgacat                           |                                          |
| pXZ206_F  | atgtcaatgccACCgatgtgagcaaaa                            | Used for creation of JamB (M5T)          |
| pXZ206_R  | ttttgctcacatcGGTtggcattgacat                           |                                          |
| pXZ207_F  | atgtcaatgccATGCgatgtgagcaaaa                           | Used for creation of JamB (M5C)          |
| pXZ207_R  | ttttgctcacatcGCATggcattgacat                           |                                          |
| pXZ208_F  | atgtcaatgccATTgatgtgagcaaaa                            | Used for creation of JamB (M5F)          |
| pXZ208_R  | ttttgctcacatcAAATggcattgacat                           |                                          |
| pXZ209_F  | atgtcaatgccGCGgatgtgagcaaaa                            | Used for creation of JamB (M5A)          |
| pXZ209_R  | ttttgctcacatcCGCtggcattgacat                           |                                          |
| pXZ210_F  | gtcaaaaaccaAAtcaaatgattac                              | Used for creation of JamB (I23K)         |
| pXZ210_R  | gtaatcatttgaTTtggttttgac                               |                                          |
| pXZ211_F  | aagtcaaaaaccGAGtcaaatgattac                            | Used for creation of JamB (I23E)         |
| pXZ211_R  | gtaatcatttgaCTCggtttttgactt                            |                                          |
| pXZ212_F  | aagtcaaaaaccACCtcaaatgattaca                           | Used for creation of JamB (I23T)         |
| pXZ212_R  | tgtaatcatttgaGGTggtttttgactt                           |                                          |
| pXZ213_F  | aagtcaaaaaccTGCtcaaatgattaca                           | Used for creation of JamB (I23C)         |
| pXZ213_R  | tgtaatcatttgaGCAggtttttgactt                           |                                          |
| pXZ214_F  | aagtcaaaaaccTACtcaaatgattaca                           | Used for creation of JamB (I23Y)         |
| pXZ214_R  | tgtaatcatttgaGTAggtttttgactt                           |                                          |
| pXZ215_F  | aagtcaaaaaccGTGtcaaatgattaca                           | Used for creation of JamB (I23V)         |
| pXZ215_R  | tgtaatcatttgaCACggtttttgactt                           |                                          |
| pXZ216_F  | CGCAGCCGCAAACCGGGatggatgtgagcaaaaaatc                  | Used for creation of JamB-TtuB           |
| pXZ216_F1 | AAAcataTGAGTAATACATTTGACAACGCCCTCGCGCAGCCGCAAACCGGGatg |                                          |
| pXZ217_F  | AAAcataatggatgtgagcaaaaaatc                            | Used for creation of JamB-CamB           |

**Table S2.** Plasmids used in this study.

| Plasmid | Derived from | Function                            |
|---------|--------------|-------------------------------------|
| pXZ27   | pCDFDuet-1   | Coexpression of JamA and HsPKS1     |
| pXZ43   | pETDuet-1    | Coexpression of JamC and JamB       |
| pXZ44   | pETDuet-1    | Expression of JamC                  |
| pXZ167  | pETDuet-1    | Coexpression of JamC and JamB-M5I   |
| pXZ168  | pETDuet-1    | Coexpression of JamC and JamB-V189A |
| pXZ169  | pETDuet-1    | Coexpression of JamC and JamB-K250N |
| pXZ204  | pETDuet-1    | Coexpression of JamC and JamB-M5K   |
| pXZ205  | pETDuet-1    | Coexpression of JamC and JamB-M5E   |
| pXZ206  | pETDuet-1    | Coexpression of JamC and JamB-M5T   |
| pXZ207  | pETDuet-1    | Coexpression of JamC and JamB-M5C   |
| pXZ208  | pETDuet-1    | Coexpression of JamC and JamB-M5F   |
| pXZ209  | pETDuet-1    | Coexpression of JamC and JamB-M5A   |
| pXZ210  | pETDuet-1    | Coexpression of JamC and JamB-I23K  |
| pXZ211  | pETDuet-1    | Coexpression of JamC and JamB-I23E  |
| pXZ212  | pETDuet-1    | Coexpression of JamC and JamB-I23T  |
| pXZ213  | pETDuet-1    | Coexpression of JamC and JamB-I23C  |
| pXZ214  | pETDuet-1    | Coexpression of JamC and JamB-I23Y  |
| pXZ215  | pETDuet-1    | Coexpression of JamC and JamB-I23V  |
| pXZ216  | pETDuet-1    | Coexpression of JamC and JamB-TtuB  |
| pXZ217  | pETDuet-1    | Coexpression of JamC and JamB-CamB  |

**Table S3.** Strains used in this study.

| Strain | Genes                                           | Plasmids                           |
|--------|-------------------------------------------------|------------------------------------|
| XZ1    | <i>Hspks1, jamA, jamB, jamC</i>                 | pXZ27, pXZ43                       |
| XZ5    | <i>Hspks1, jamA, jamC</i>                       | pXZ27, pXZ44                       |
| XZ1_1  | <i>Hspks1, jamA, jamB-M5I/V189A/K250N, jamC</i> | pXZ27, pXZ43 mutant (from library) |
| XZ1_2  | <i>Hspks1, jamA, jamB-M5V, jamC</i>             | pXZ27, pXZ43 mutant (from library) |
| XZ1_3  | <i>Hspks1, jamA, jamB-I23M, jamC</i>            | pXZ27, pXZ43 mutant (from library) |
| XZ1_4  | <i>Hspks1, jamA, jamB-M5I, jamC</i>             | pXZ27, pXZ167                      |
| XZ1_5  | <i>Hspks1, jamA, jamB-V189A, jamC</i>           | pXZ27, pXZ168                      |
| XZ1_6  | <i>Hspks1, jamA, jamB-K250N, jamC</i>           | pXZ27, pXZ169                      |
| XZ1_7  | <i>Hspks1, jamA, jamB-M5T, jamC</i>             | pXZ27, pXZ206                      |
| XZ1_8  | <i>Hspks1, jamA, jamB-ttuB, jamC</i>            | pXZ27, pXZ216                      |
| XZ1_9  | <i>Hspks1, jamA, jamB-camB, jamC</i>            | pXZ27, pXZ217                      |
| XZ1_10 | <i>Hspks1, jamA, jamB-M5K, jamC</i>             | pXZ27, pXZ204                      |
| XZ1_11 | <i>Hspks1, jamA, jamB-M5E, jamC</i>             | pXZ27, pXZ205                      |
| XZ1_12 | <i>Hspks1, jamA, jamB-M5C, jamC</i>             | pXZ27, pXZ207                      |
| XZ1_13 | <i>Hspks1, jamA, jamB-M5F, jamC</i>             | pXZ27, pXZ208                      |
| XZ1_14 | <i>Hspks1, jamA, jamB-M5A, jamC</i>             | pXZ27, pXZ209                      |
| XZ1_15 | <i>Hspks1, jamA, jamB-I23K, jamC</i>            | pXZ27, pXZ210                      |
| XZ1_16 | <i>Hspks1, jamA, jamB-I23E, jamC</i>            | pXZ27, pXZ211                      |
| XZ1_17 | <i>Hspks1, jamA, jamB-I23T, jamC</i>            | pXZ27, pXZ212                      |
| XZ1_18 | <i>Hspks1, jamA, jamB-I23C, jamC</i>            | pXZ27, pXZ213                      |
| XZ1_19 | <i>Hspks1, jamA, jamB-I23Y, jamC</i>            | pXZ27, pXZ214                      |
| XZ1_20 | <i>Hspks1, jamA, jamB-I23V, jamC</i>            | pXZ27, pXZ215                      |

**Table S4.** Probes used in this study.

| Probe    | $\lambda_{\text{ex}}$ | $\lambda_{\text{em}}$ | Folds of fluorescence enhancement of XZ1* |                        |
|----------|-----------------------|-----------------------|-------------------------------------------|------------------------|
|          |                       |                       | Cell-containing cultures                  | Cell-free supernatants |
| <b>3</b> | 500                   | 515                   | --                                        | 2x                     |
| <b>4</b> | 500                   | 520                   | 12x                                       | 20x                    |
| <b>5</b> | 592                   | 610                   | 14x                                       | 39x                    |
| <b>6</b> | 660                   | 675                   | 4x                                        | 12x                    |

\*Folds of fluorescence enhancement were calculated as the ratio of the fluorescence of XZ1 to that of the medium-only control.

## Supplementary Figures

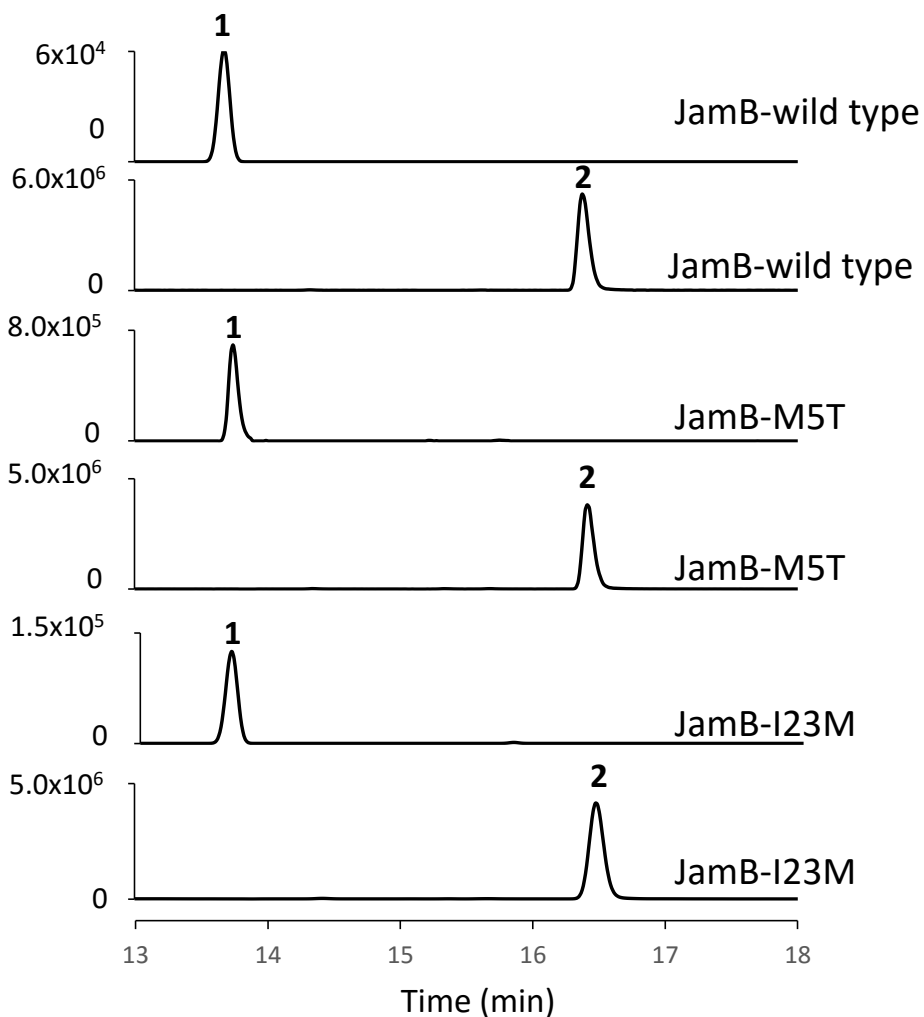

**Figure S1.** Efficiencies in the production of **1** compared to the wild-type strain (XZ1) when all cultures were fed with hexanoic acid. Extracted ion chromatograms (**1**:  $m/z$  179.0703  $[M+H]^+$ , **2**:  $m/z$  183.1016  $[M+H]^+$ ) showed that compared to the wild type, the ratios between compounds **1** and **2** were increased by ~20-fold and ~2-fold from the strains expressing JamB-M5T and JamB-I23M, respectively. The calculated mass with 10 ppm mass error tolerance was used.



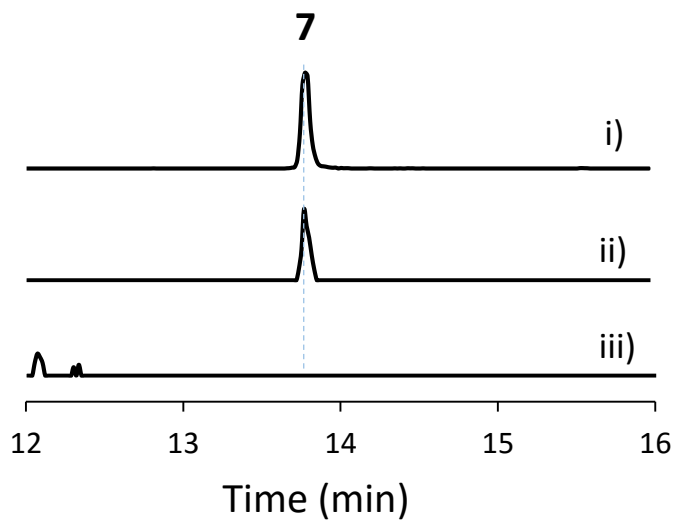

**Figure S2.** Extracted ion chromatograms (**7**:  $m/z$  832.3287  $[M+H]^+$ ) showing production of **7** upon the reaction with XZ1 supernatant (trace ii), but not with the XZ5 supernatant (traces iii). The compound synthesized by a chemical reaction using pure **1** and **4** is shown for comparison (trace i). The calculated mass with 10 ppm mass error tolerance was used.

a)

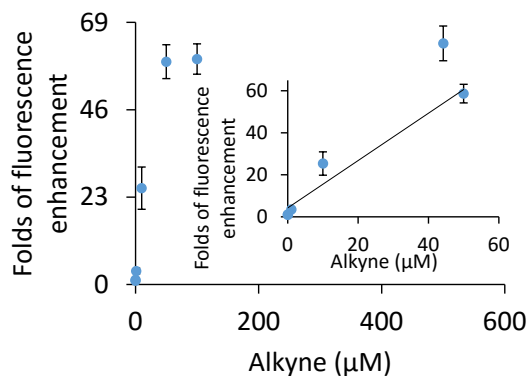

b)

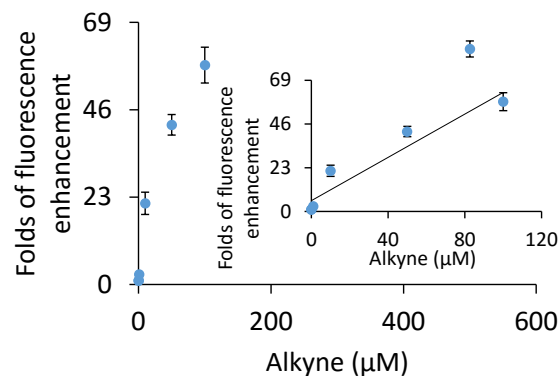

**Figure S3.** By varying the concentrations of probe **4** used in the assays, the linear detection range can be adjusted. One-fold fluorescence enhancement corresponds to the signal obtained from the reaction with pure medium. (a) When 3  $\mu\text{M}$  of **4** was used, 0.05-50  $\mu\text{M}$  of alkynes can be detected in a linear range,  $R^2=0.95$ . (b) When 10  $\mu\text{M}$  of **4** was used, 0.05-100  $\mu\text{M}$  of alkynes can be detected in a linear range,  $R^2=0.92$ . Error bars represent standard deviations from three measurements.

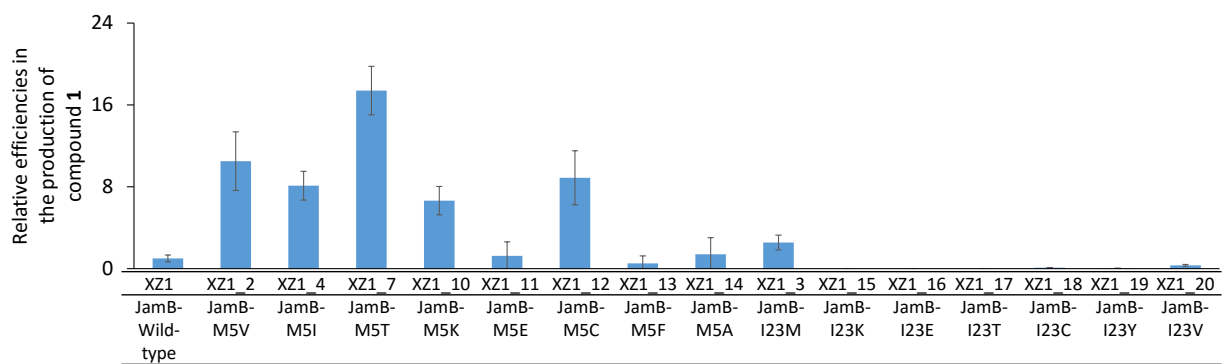

**Figure S4.** Relative efficiencies in the production of **1** compared to the wild-type strain (XZ1) when all cultures were fed with hexanoic acid. The efficiency of the wild-type JamB in the production of compound **1** in XZ1 was set to be 100%. Error bars represent standard deviations from three measurements.

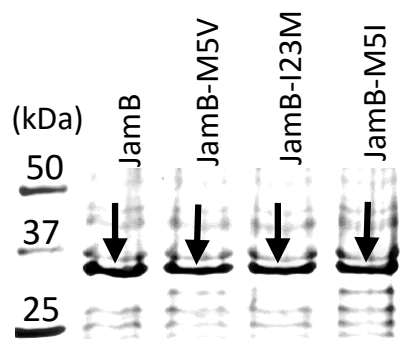

**Figure S5.** SDS-PAGE analysis of membrane fractions of the engineered *E. coli*. Representative SDS-PAGEs showed that JamB-M5I/V and JamB-I23M were expressed at a level comparable to the wild-type (~36 kDa). Mini-PROTEAN® gel (4-15% precast, Biorad) was used.

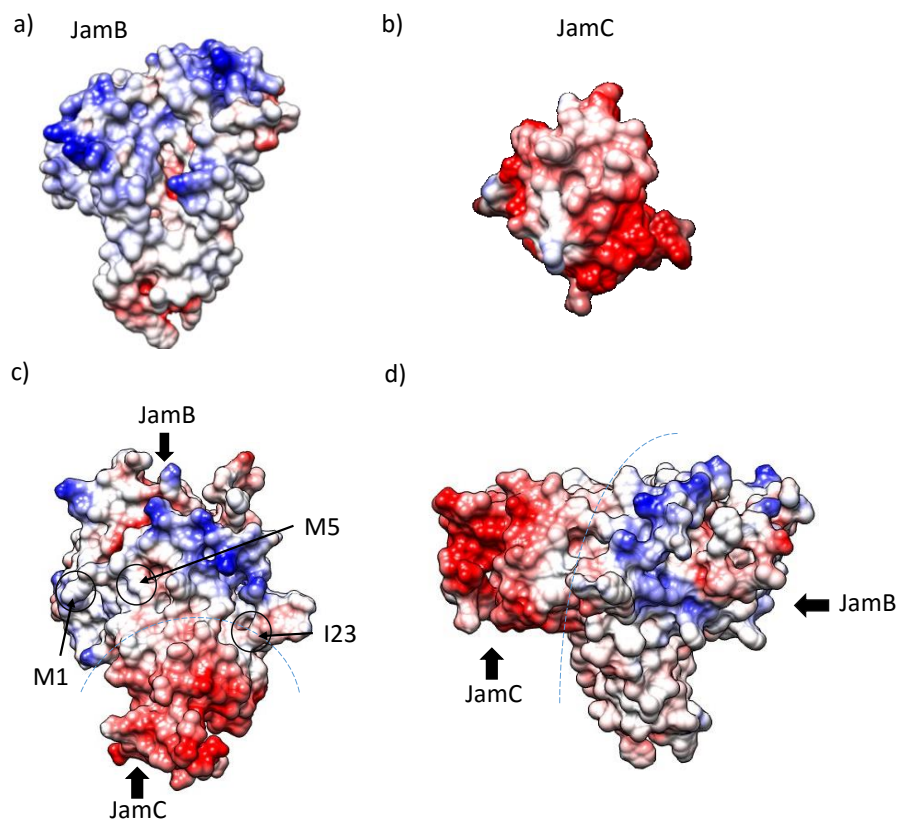

**Figure S6.** Modeled structures of JamB, JamC, and JamB-JamC complex. Coulombic surfaces of JamB (a), and JamC (b) are oriented with their proposed interaction surface towards the viewer. Coulombic surfaces of the JamB-JamC complex are shown at different angles in (c) and (d). Electro-negative surface is shown in red, and electro-positive surface is shown in blue.

TtuB 1 MSNTFDNALAQPQTGMDLEGVSTVAPRKKSRKNARVTLNDPGVQATQKVIAYLTIIVPLL  
 CamB 1 .....MDVTKE.SFKPAKTQK...SKTILNDYIKGLQTKHFLLYNVIPAI  
 JamB 1 .....MSMPMDVSKK.SFKPAKTQK...SKTILNDYIKGLQTKHFLLYNVIPAI

TtuB 61 GLVAALYLAYQNGISQLDIALLVGMYLITNLGTEMGYHRLFAHRTFKTFGFGVHYLLMVF  
 CamB 42 GTVIAIALLLWYPISSVEIGLLIGMWALSMIGMSLGLHRYFAHRAFKTSETMRVILAILG  
 JamB 46 GTITATAALLWYPISSVEIGLLIGMWALSMIGMSVGLHRYFAHRAFKTSQTMVSVILAILG

TtuB 121 QMAGEGCVTYWVA THRRHHIHSDTALDPHSPHTCHTGAEPEELNLRGLLHAHLGWMVND  
 CamB 102 CMGAQGPVVS WVA THRRHHHEYSDLPDHPHSPNPELLGE..GIFGKLRGLNHAHVGLTNNH  
 JamB 106 CMGAQGPVVS WVA THRRHHHEYSDLPDHPHSPNPELLGE..GIFGTLRGLNHAHVGLTNNH

TtuB 181 KVTNSALFTEDLTRDPLTKAINDLYFPI LILGLIIPAAIGGIVTNSWYGALTGLWGGLV  
 CamB 160 EYPNPMYYAPELMRDKTISKINRHYVVWIVLGLLMPITILGGILHGSLGAVEGLWGGFV  
 JamB 164 EYPNPMYYAPELMRDKTISKINRNYVVWIVLGLLIPTILGGILHGSLGAVEGLWGGFV

TtuB 241 RMEFVTHSTWLNGSFAHRYGSKPFETGDHSANNFWCAIPTFGASWQNNHHAFPLSAMLGL  
 CamB 220 RMEVVDNSILSINSFSHAFGTHPFDSKDQSRNNIWWAIPTEGESWQNNHHTFENSAAGL  
 JamB 224 RMEVVDNSILSINSFSHAFGTHPFDSKDQSRNNIWWAIPTEGESWQNNHHTFENSAAGL

TtuB 301 KWWQIDLAWYFIWVFEKLGSLVSVRRLTPEHIERKKVA  
 CamB 280 KWWQIDLGYCLIWVLEKLGSLVDVKLPSAKMLEAKKLA.  
 JamB 284 KWWQIDLGYCLIWVLEKLGSLVDVKLPTAKMLEAKKLA.

**Figure S7.** Sequence alignment of TtuB, CamB, and JamB.
